# Supplementary material for: BCKDK regulates breast cancer cell adhesion and tumor metastasis by inhibiting TRIM21 ubiquitinate talin1
Source: PubMed Central journal article supplement (PMC10352378; doi:10.1038/s41419-023-05944-4), 2023-07-17
Supplement: 41419_2023_5944_MOESM6_ESM.pdf [file 41419_2023_5944_MOESM6_ESM.pdf]

FIG.1E

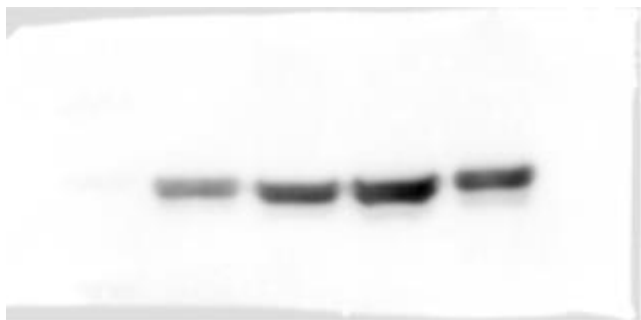

BCKDK

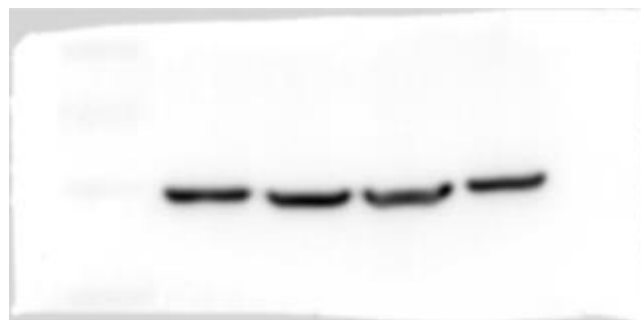

$\beta$ -actin

FIG.S1B

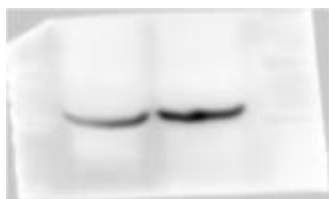

BCKDK

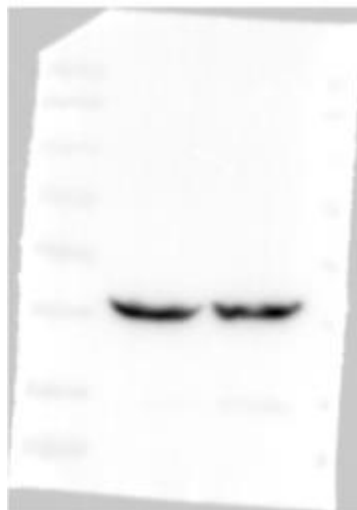

$\beta$ -actin

FIG.2A

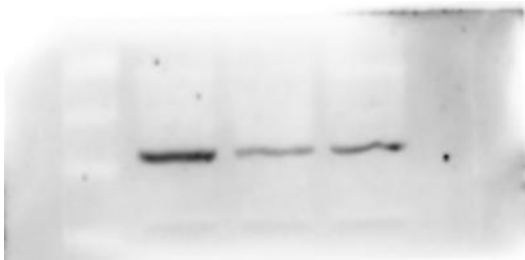

BCKDK

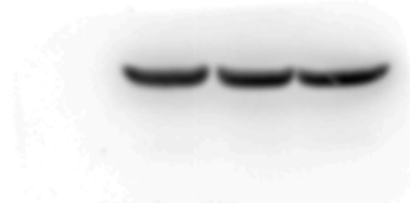

$\beta$ -actin

FIG.2B

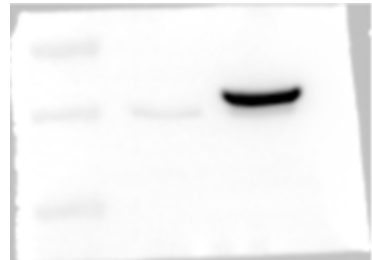

BCKDK

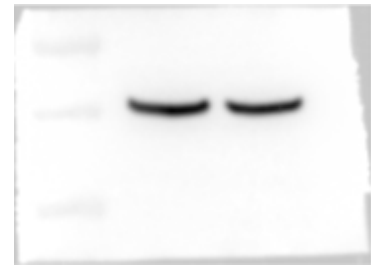

$\beta$ -actin

FIG.2I

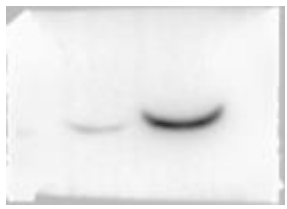

BCKDK

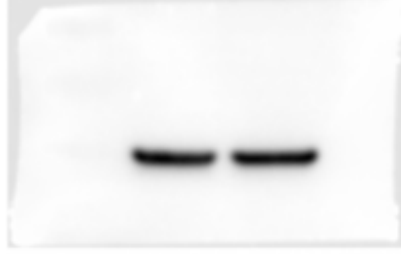

$\beta$ -actin

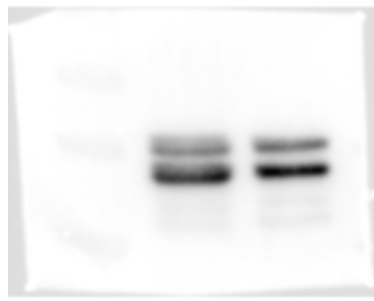

ERK1/2

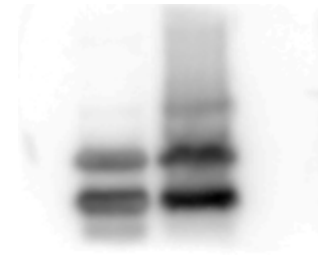

P-ERK1/2

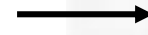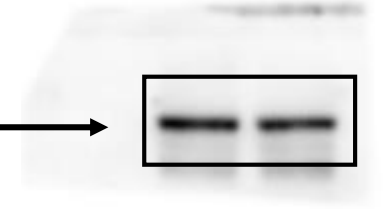

FAK

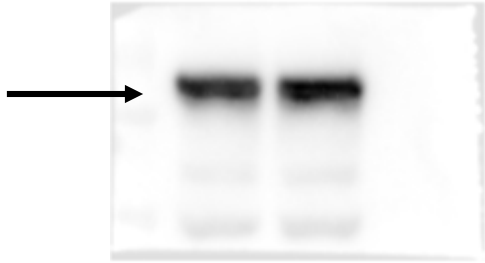

MEK1/2

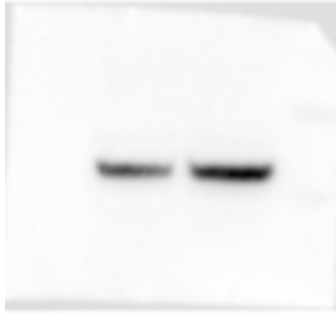

P-MEK1/2

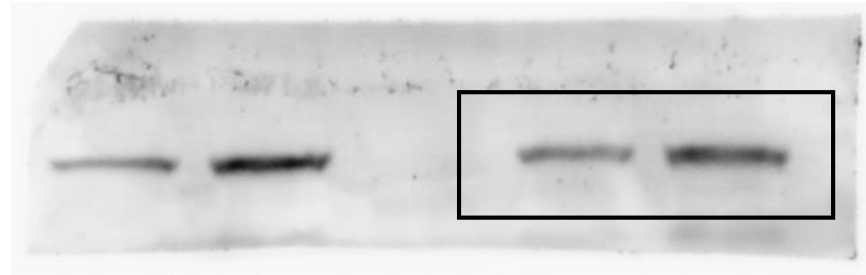

P-FAK

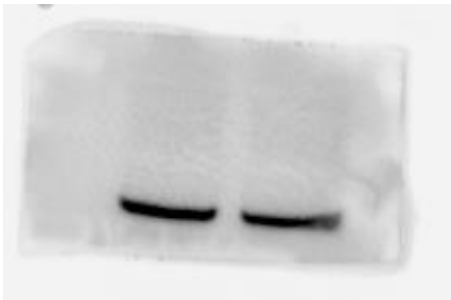

BCKDHA

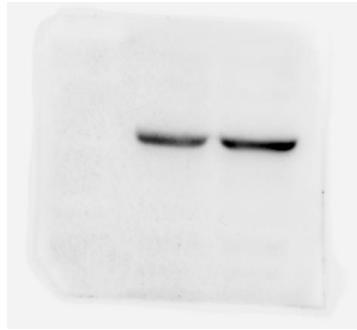

P-BCKDHA

FIG.2J

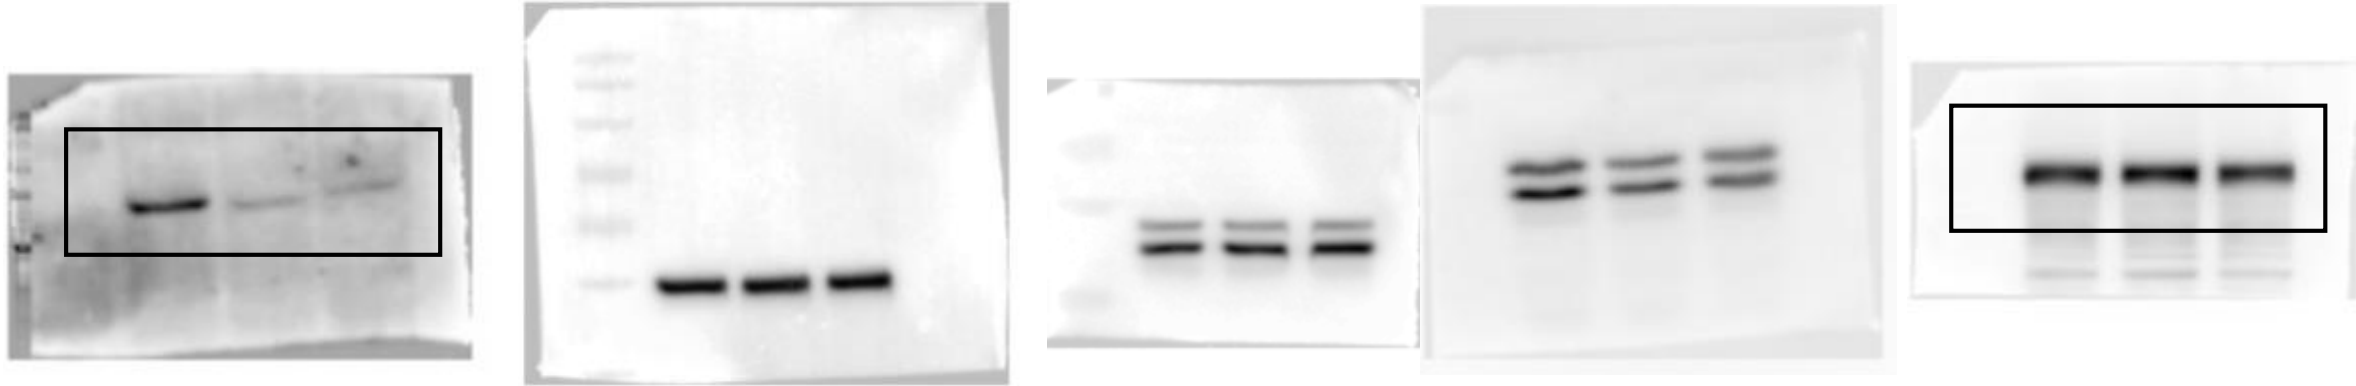

BCKDK

$\beta$ -actin

ERK1/2

P-ERK1/2

FAK

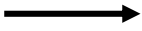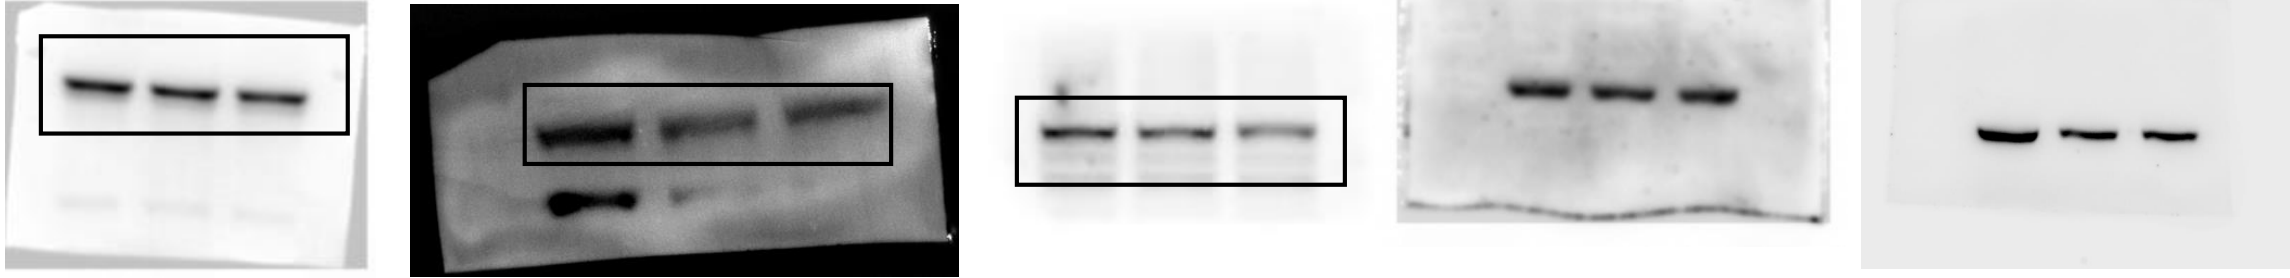

MEK1/2

P-MEK1/2

P-FAK

BCKDHA

P-BCKDHA

FIG.S2C

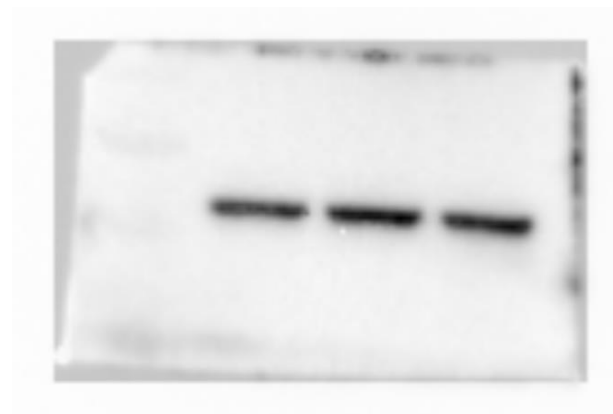

$\beta$ -actin

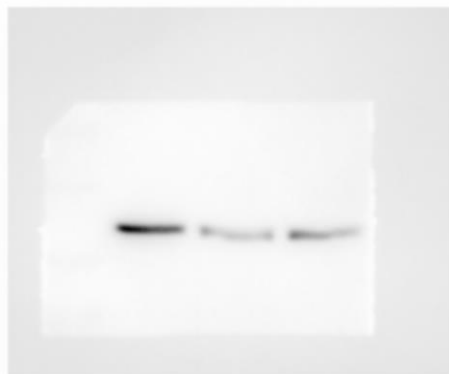

BCKDK

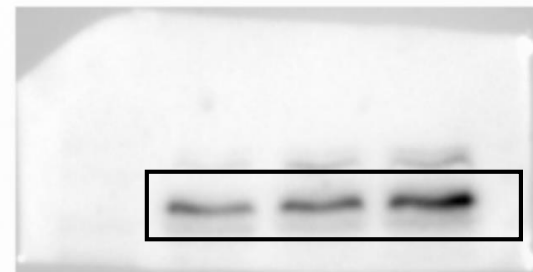

E-cadherin

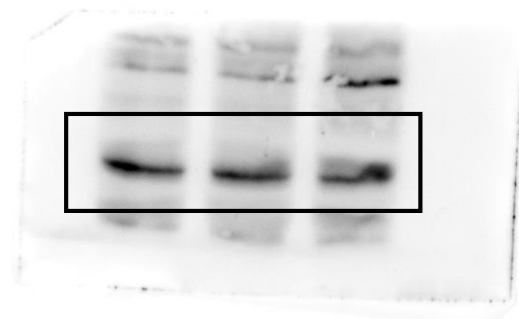

MT1-MMP

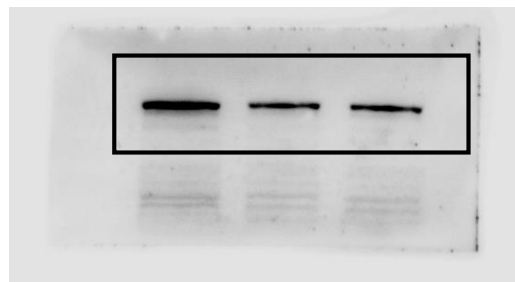

ZEB1

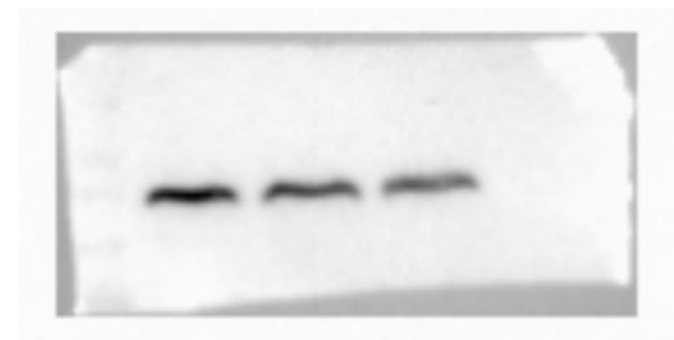

N-cadherin

FIG.S2D

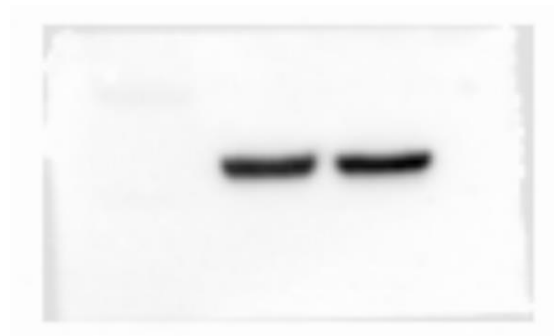

$\beta$ -actin

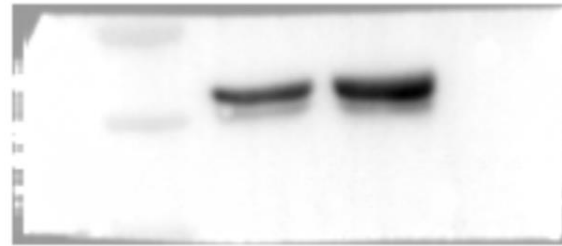

BCKDK

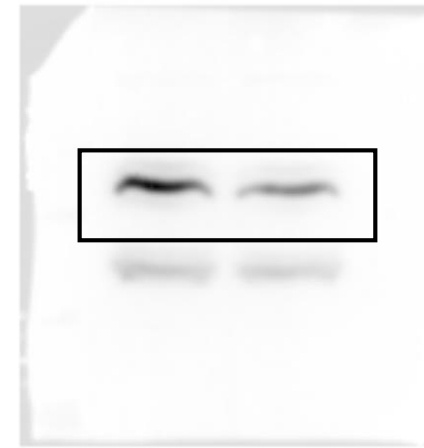

E-cadherin

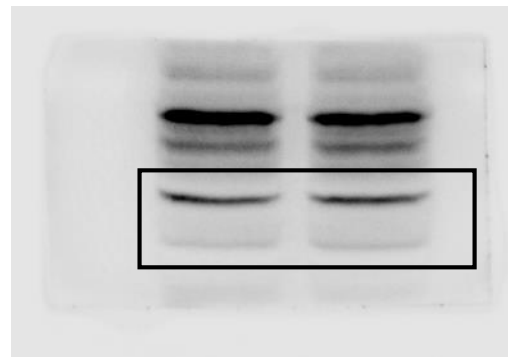

MT1-MMP

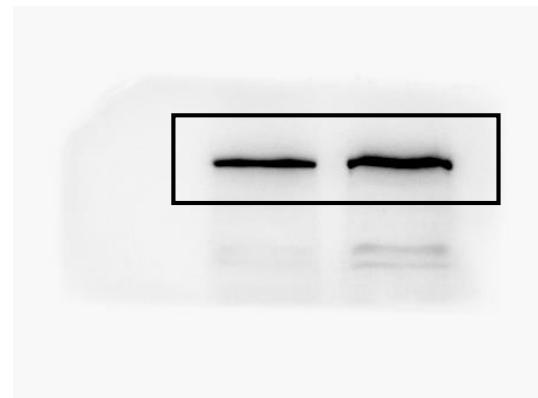

ZEB1

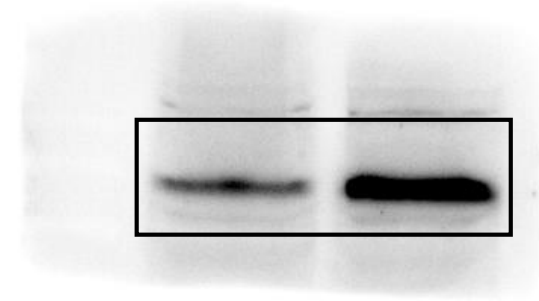

N-cadherin

FIG.3A

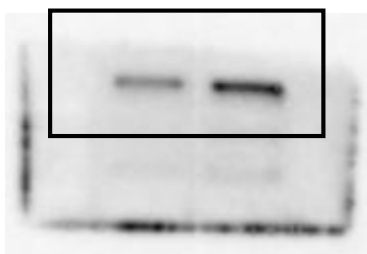

taln1

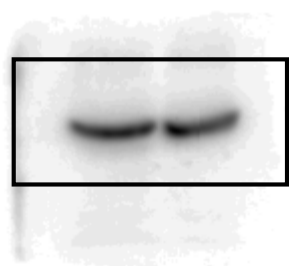

$\beta$ -actin

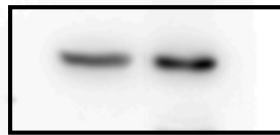

BCKDK

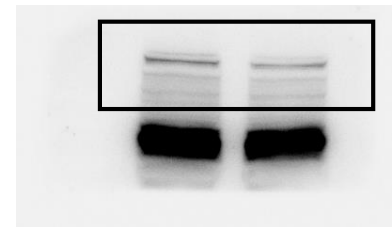

taln2

FIG.3B

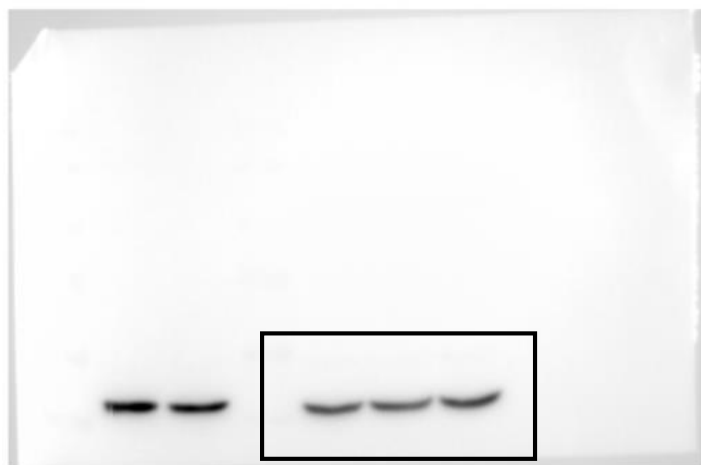

$\beta$ -actin

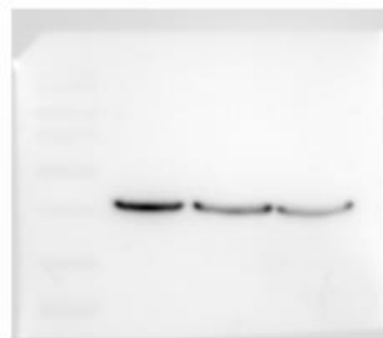

BCKDK

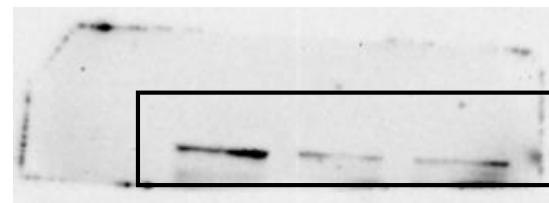

taln1

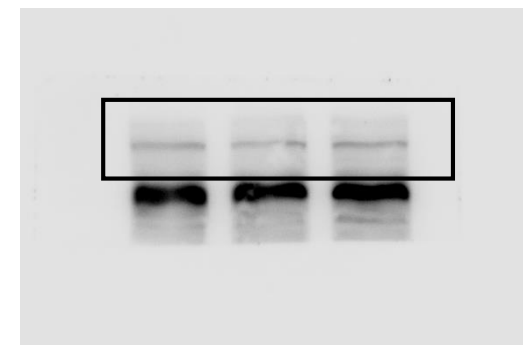

taln2



FIG.3D

KDa

60

45

35

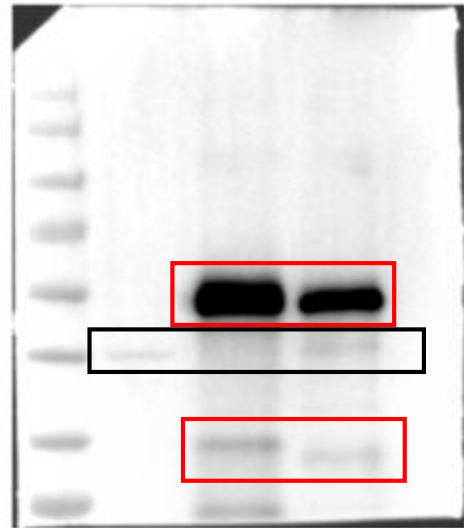

BCKDK

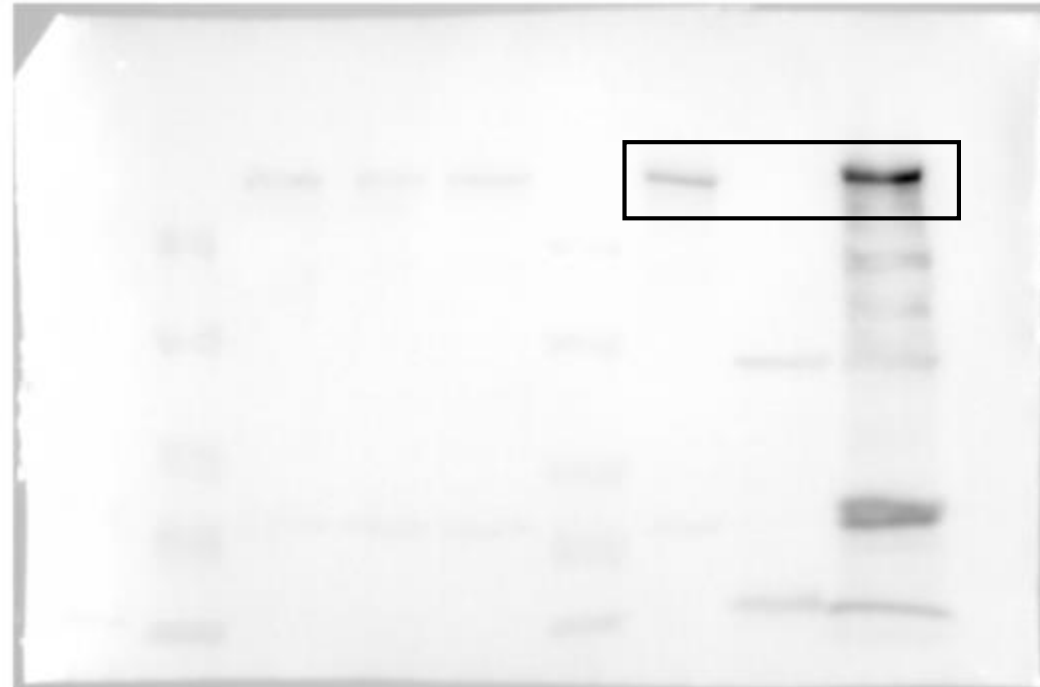

talin1

FIG.3E

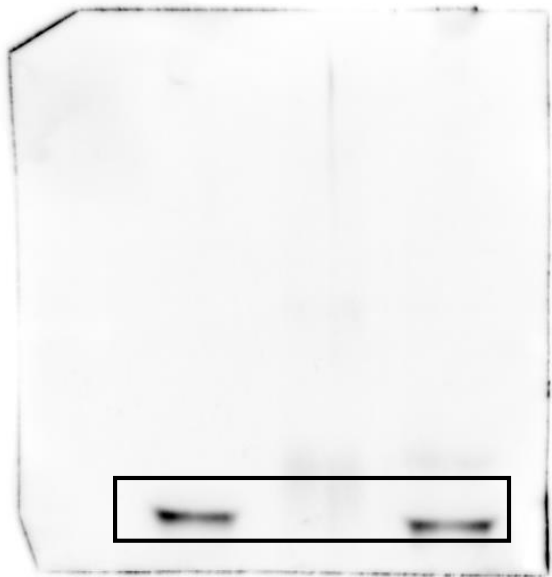

BCKDK

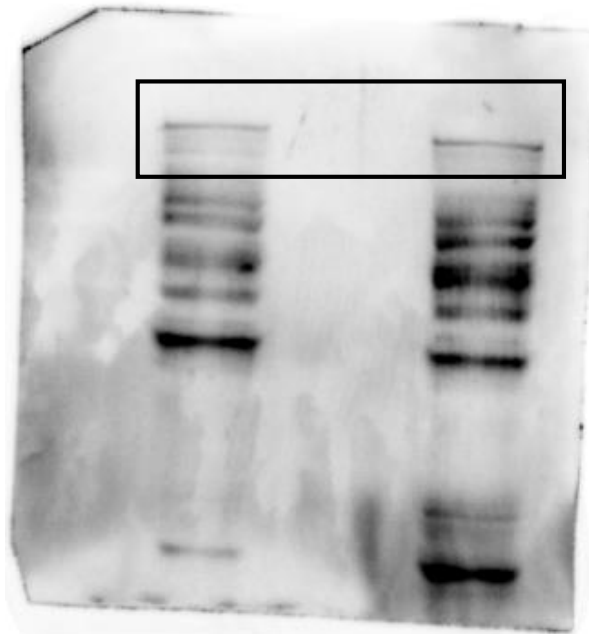

talin1

FIG.3F

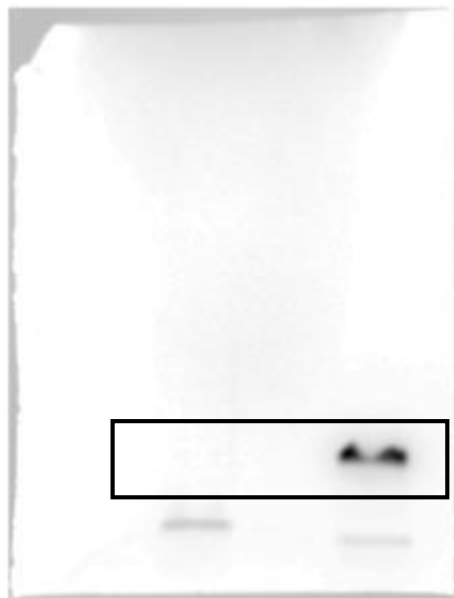

IP HA

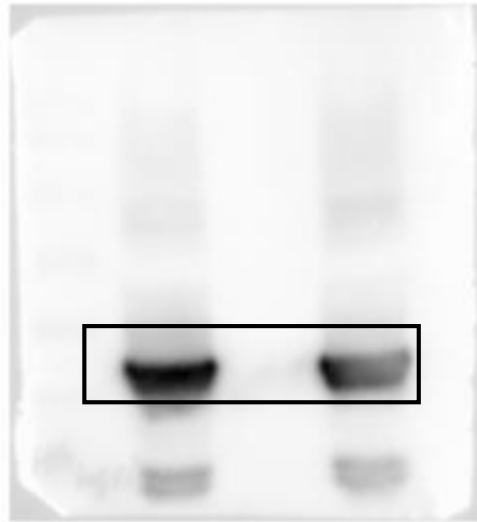

IP HA

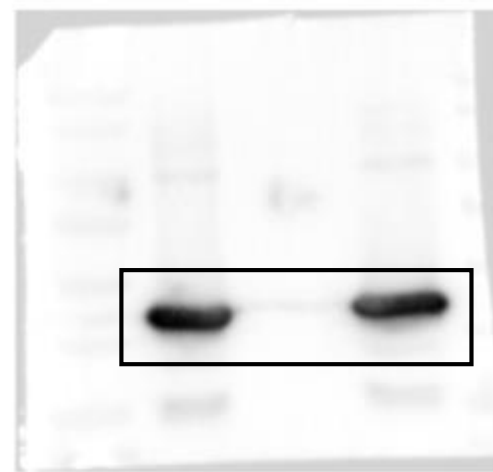

LYSATE HA

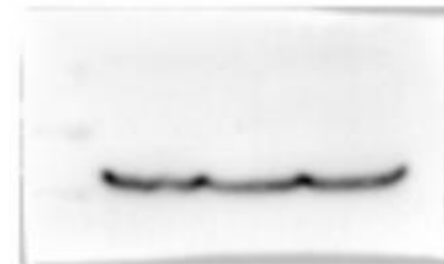

LYSATE ACTIN

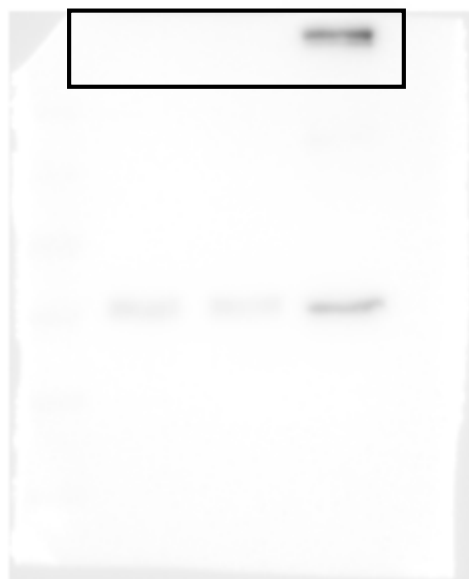

IP MYC

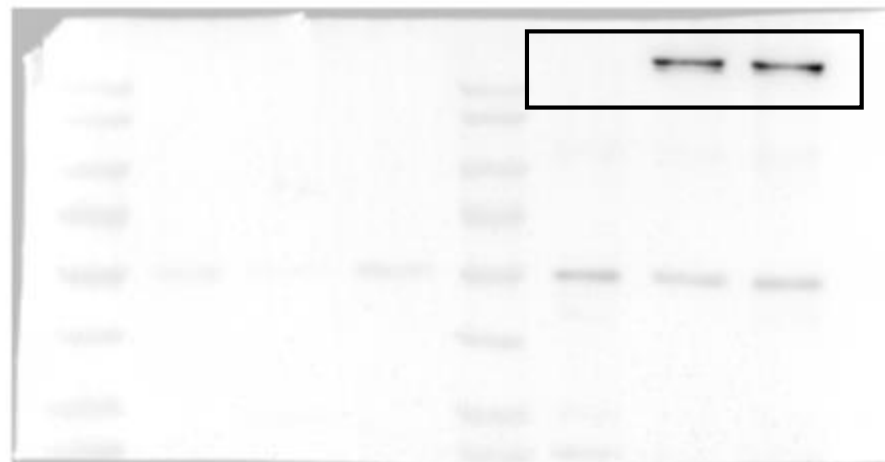

IP MYC

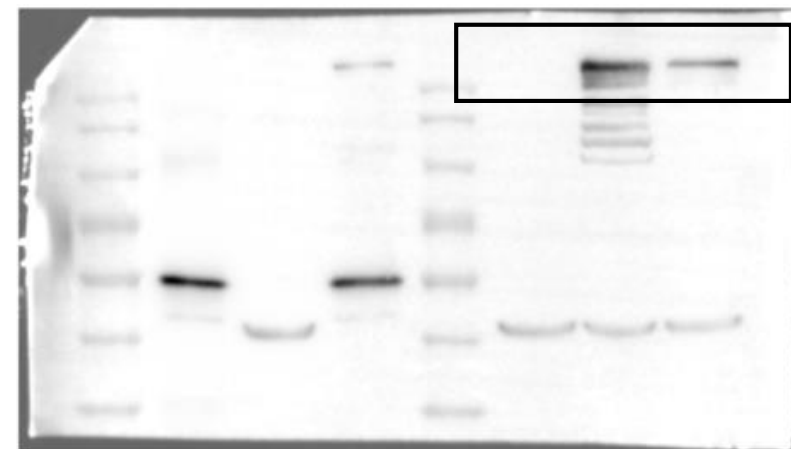

MYC

FIG.3G

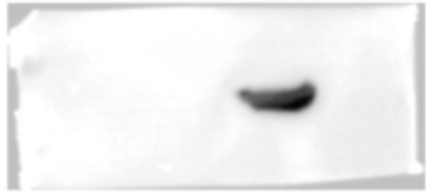

FLAG

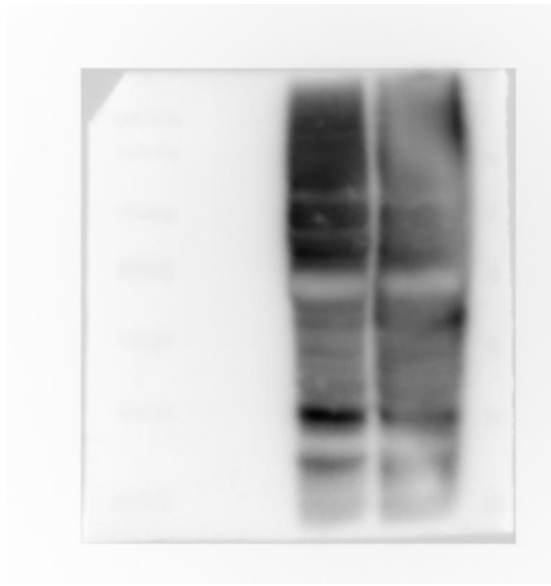

HA

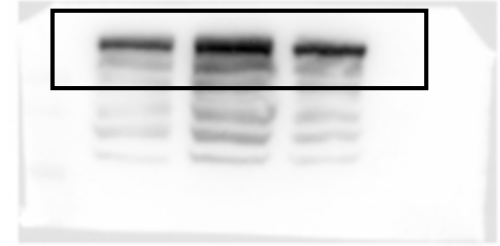

LYSATE MYC

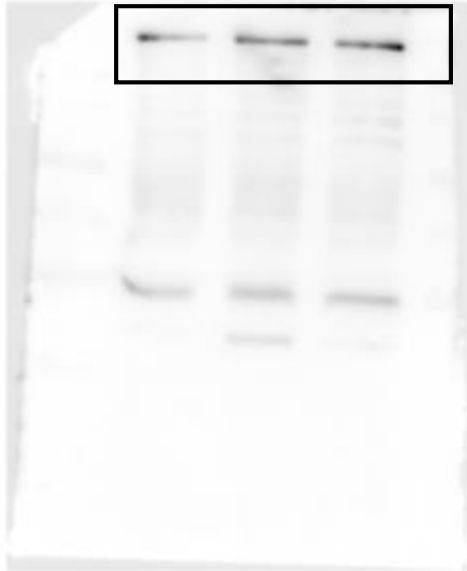

IP MYC

FIG.4A

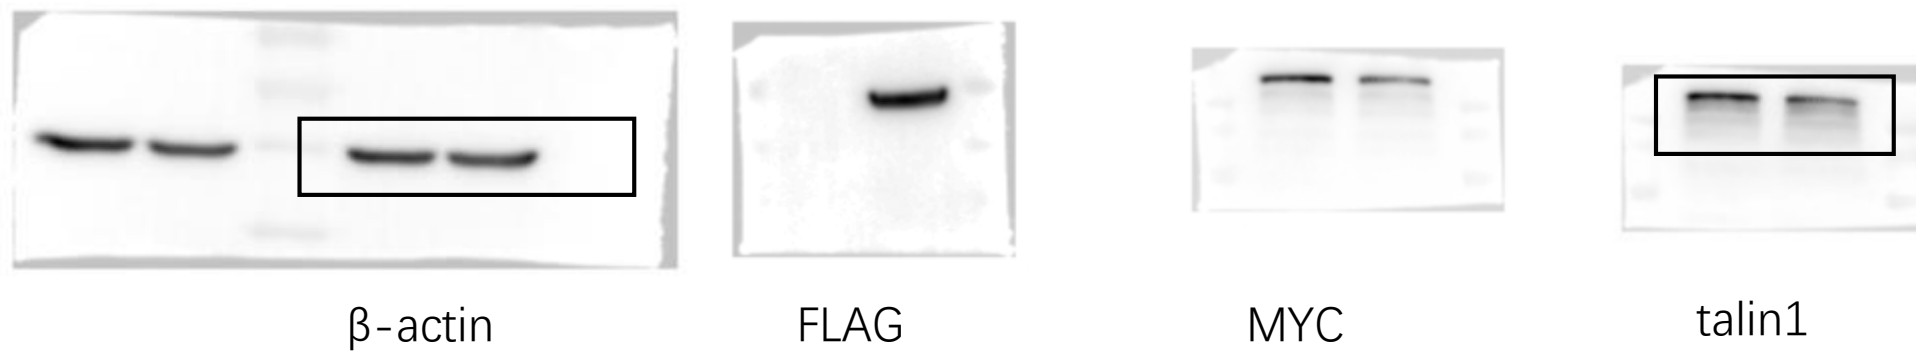

FIG.4B

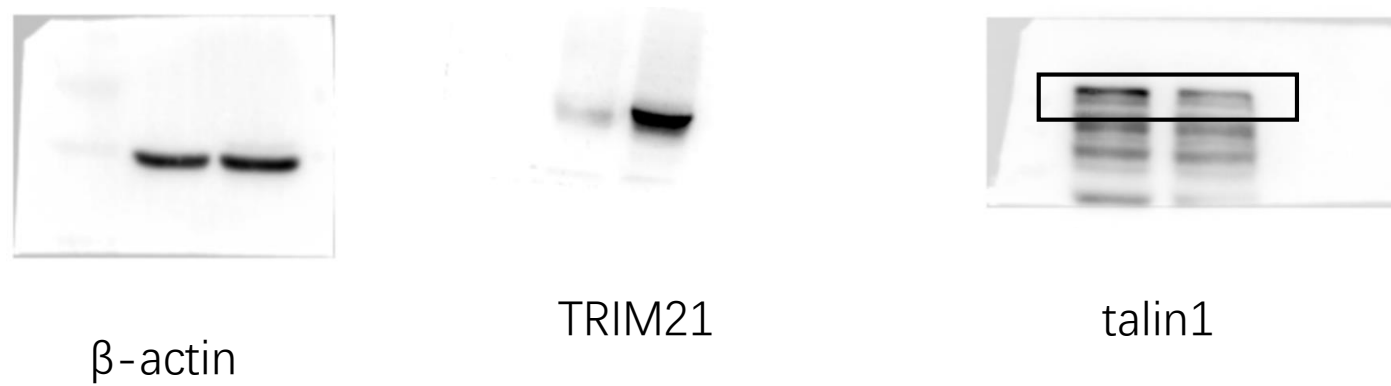

FIG.4C

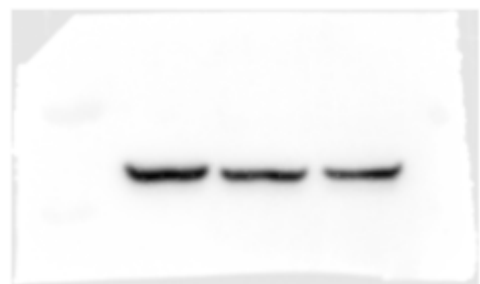

$\beta$ -actin

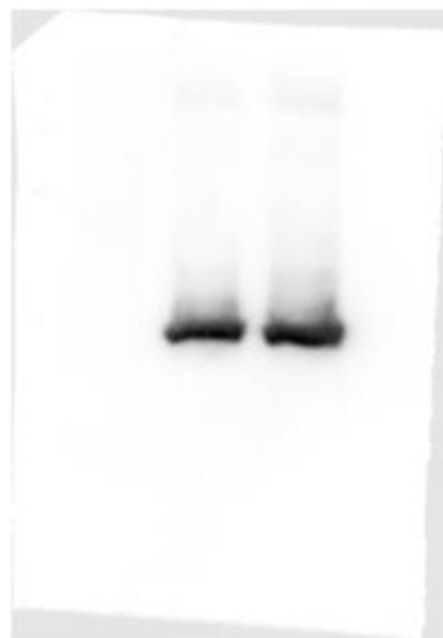

LYSATE FLAG

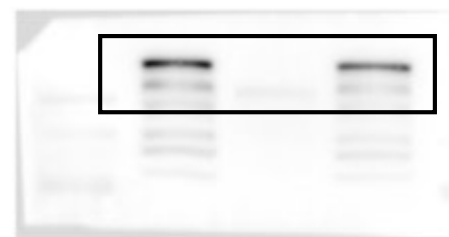

LYSATE MYC

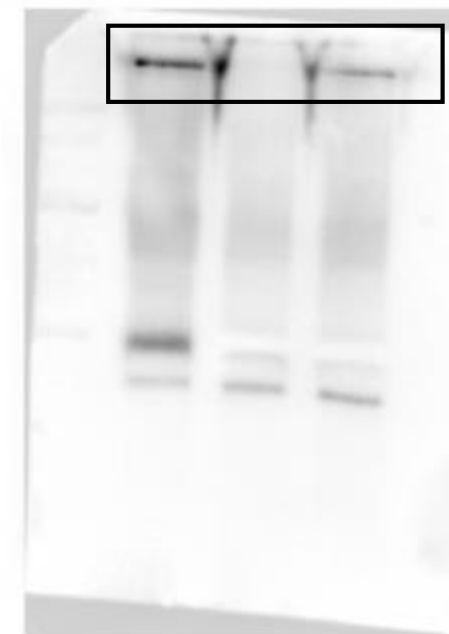

IP MYC

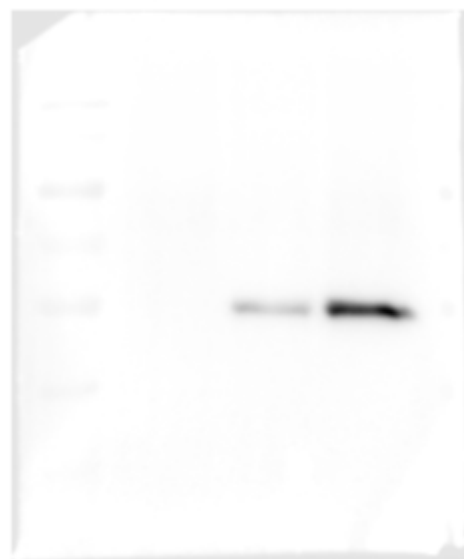

IP FLAG

FIG.4D

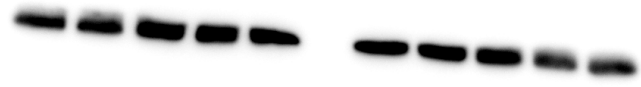

$\beta$ -actin

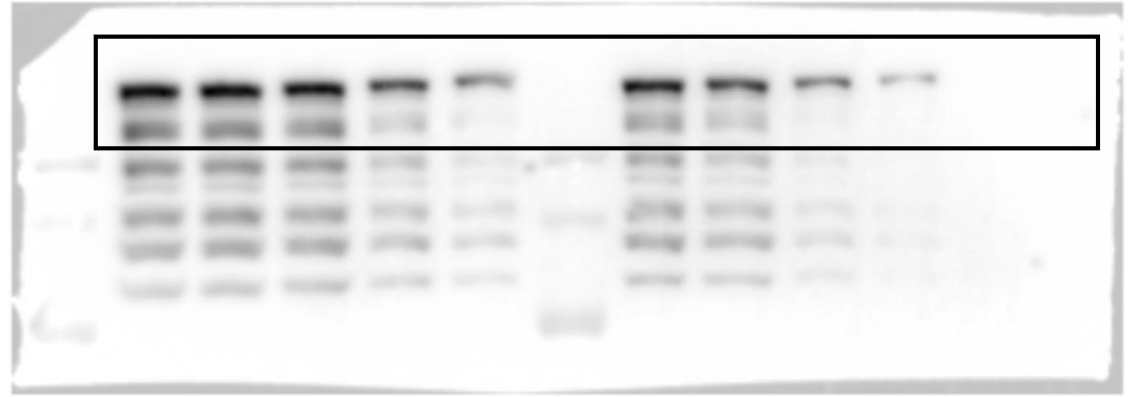

talin1

FIG.4E

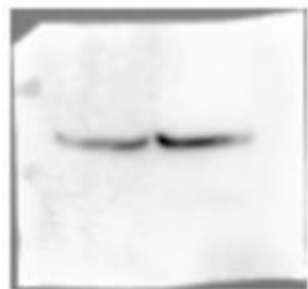

myc

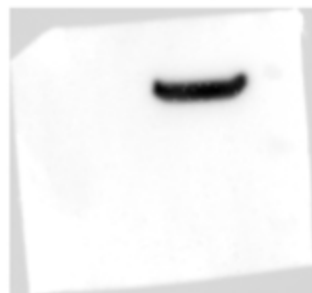

flag

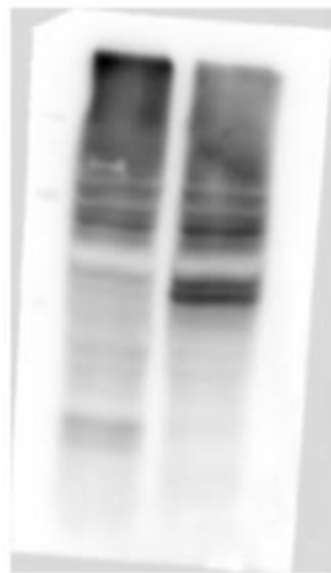

HA

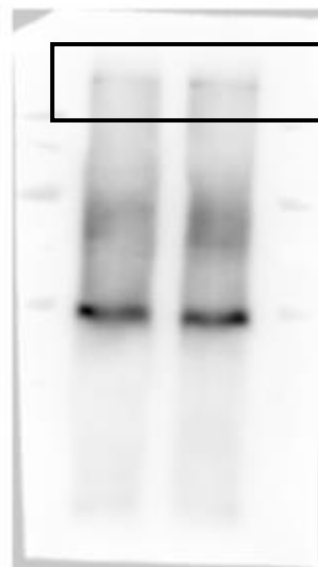

IP MYC

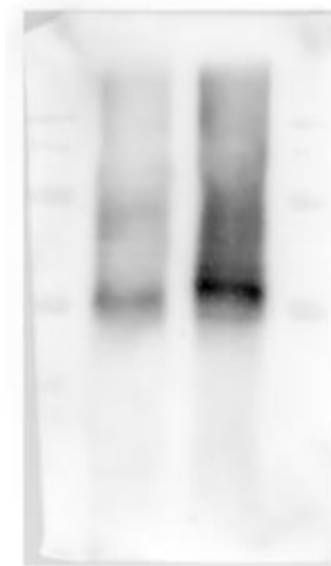

IP HA



FIG.4F

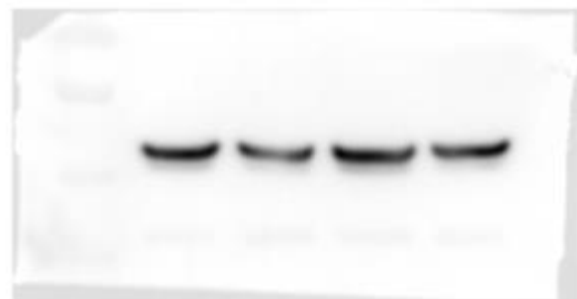

$\beta$ -actin

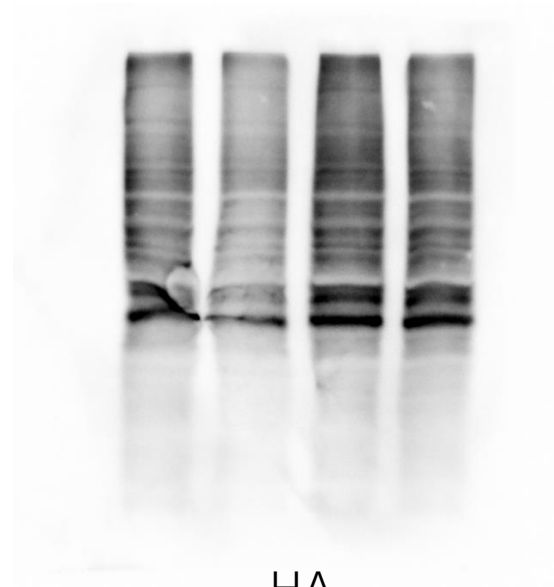

HA

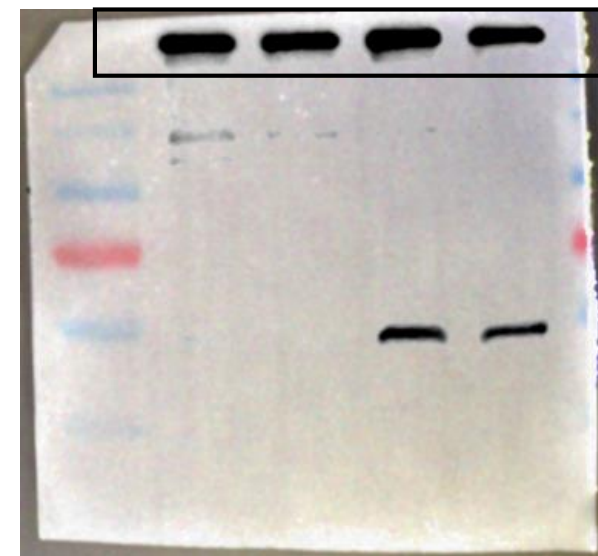

IP MYC

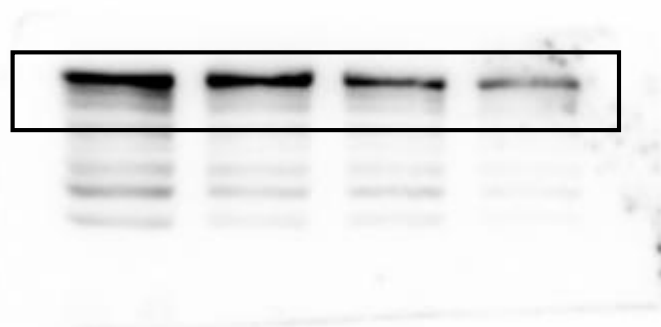

LYSATE MYC

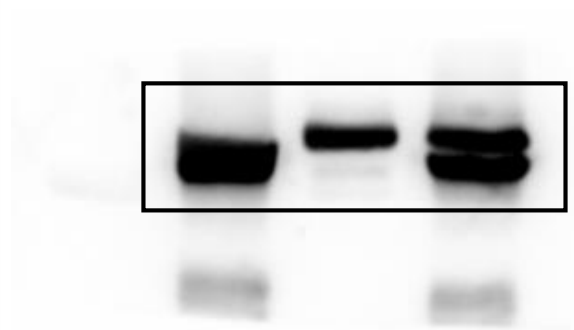

LYSATE FLAG

FIG.4G

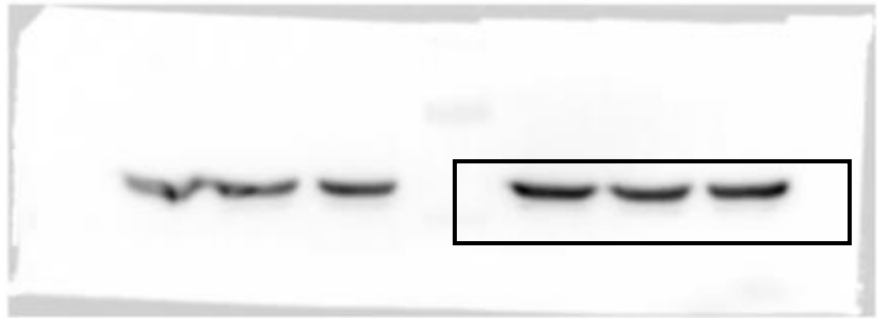

$\beta$ -actin

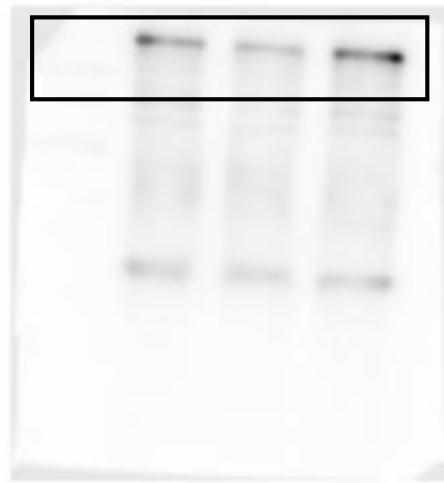

IP MYC

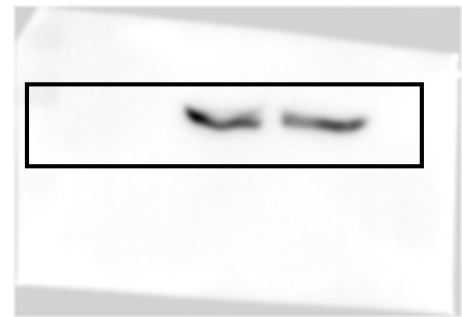

LYSATE FLAG

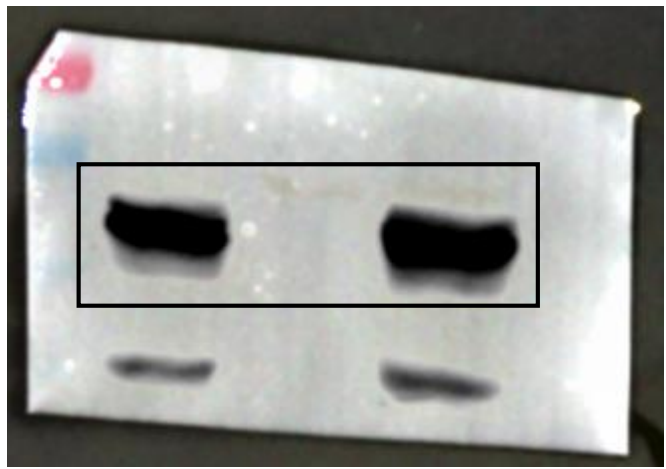

LYSATE HA

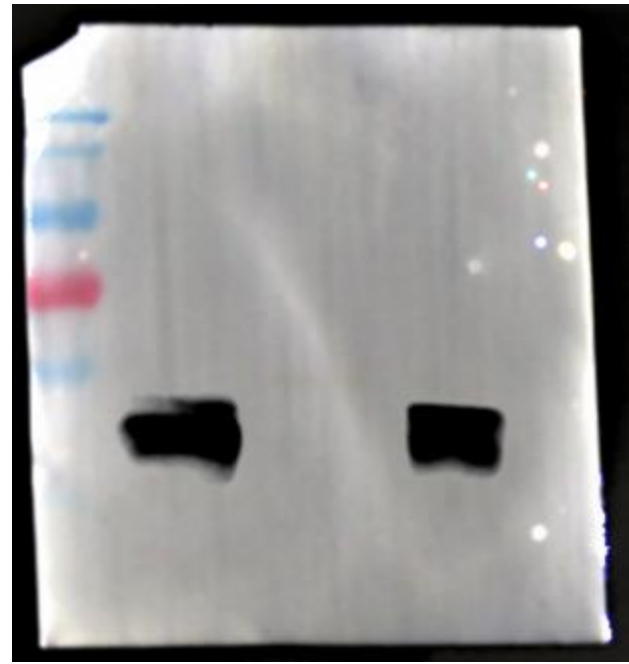

IP HA

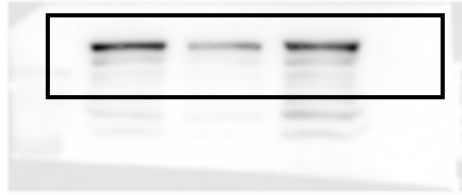

LYSATE MYC

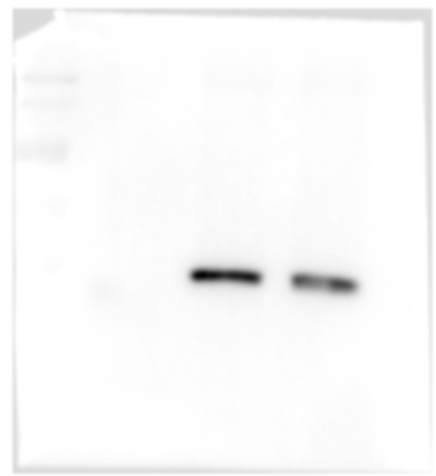

IP FLAG

FIG.S3B

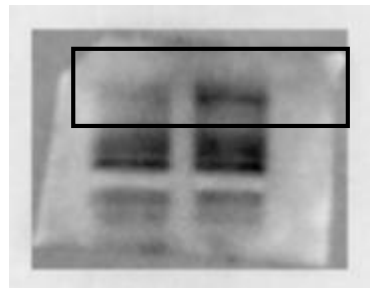

taln1

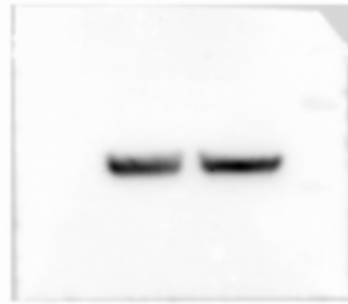

$\beta$ -actin

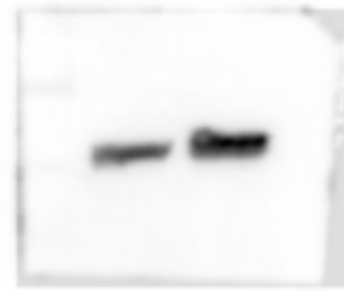

BCKDK

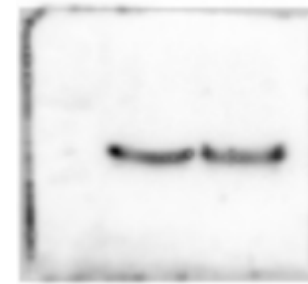

TRIM21

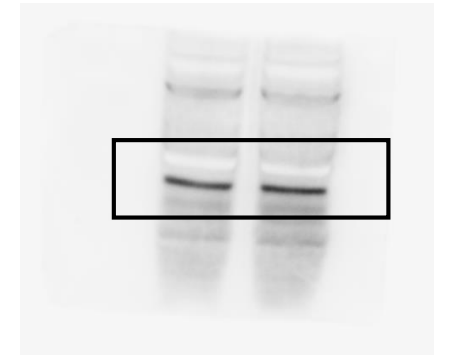

BCAT2

FIG.S3C

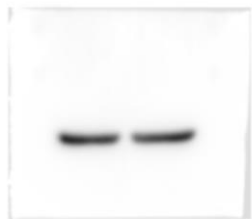

$\beta$ -actin

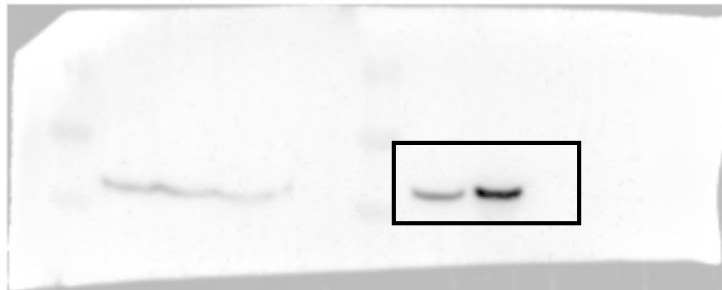

BCKDK

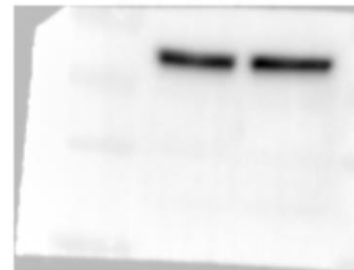

AKT

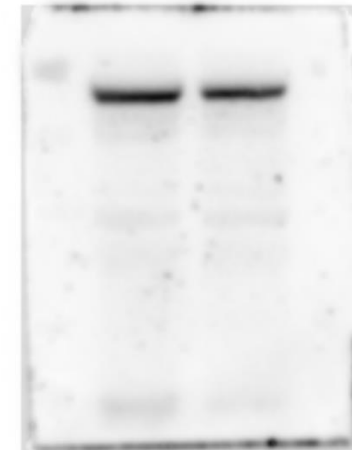

P-AKT

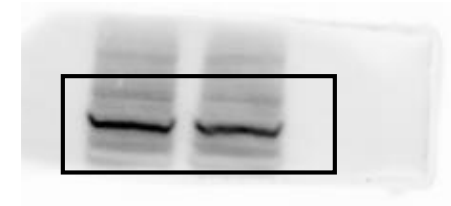

JAK2

FIG.S3D

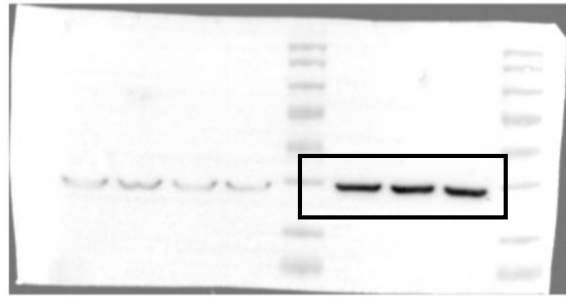

$\beta$ -actin

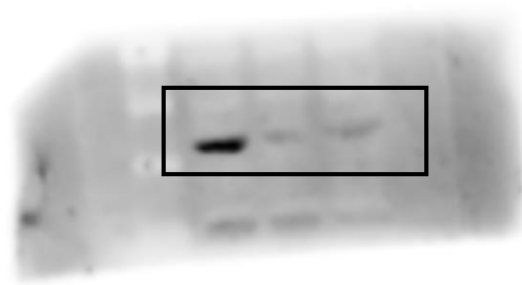

BCKDK

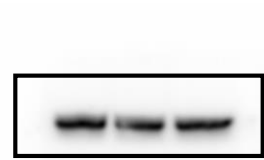

AKT

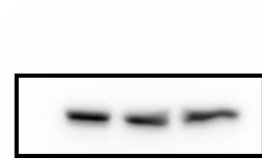

P-AKT

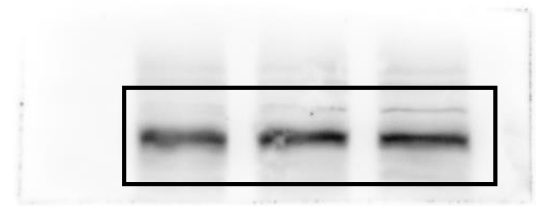

JAK2

FIG.5A

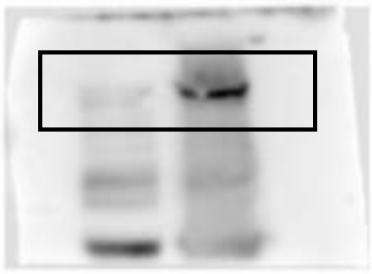

taln1

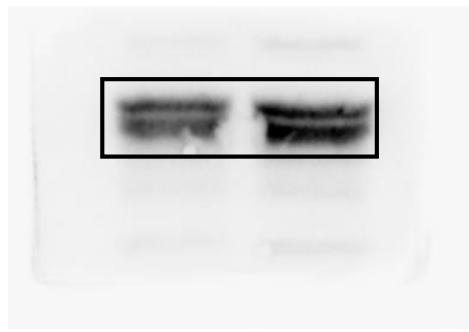

P-ERK1/2

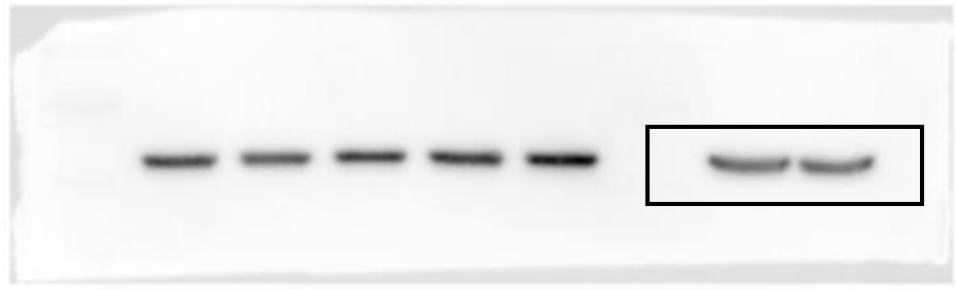

$\beta$ -actin

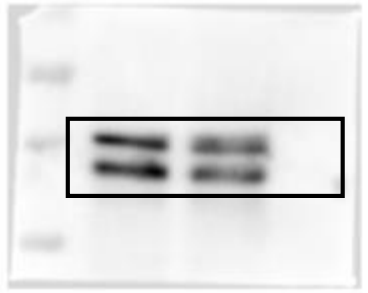

ERK1/2

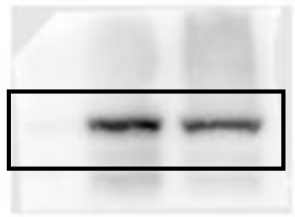

FAK

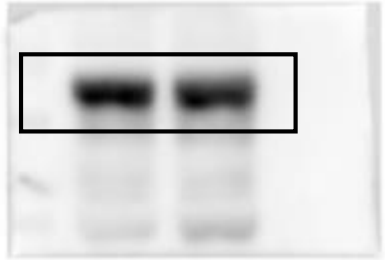

MEK1/2

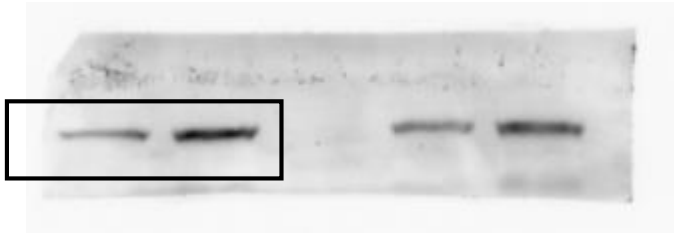

P-FAK

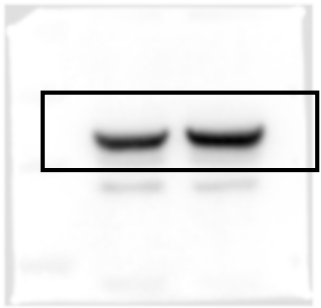

P-MEK1/2

FIG.5B

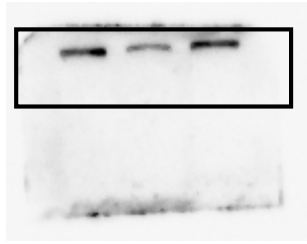

taln1

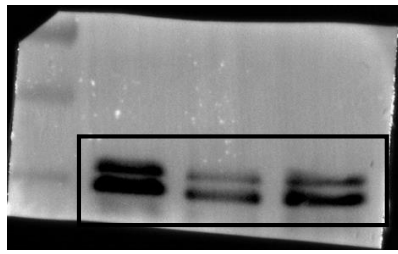

P-ERK1/2

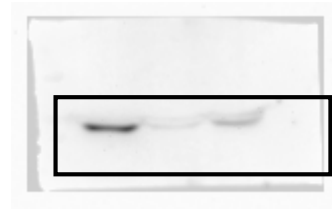

BCKDK

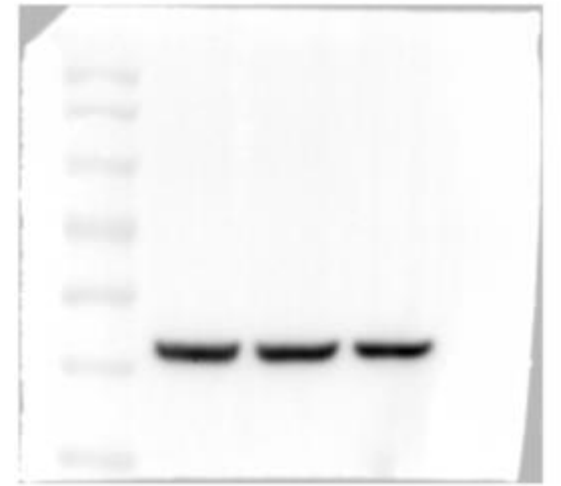

$\beta$ -actin

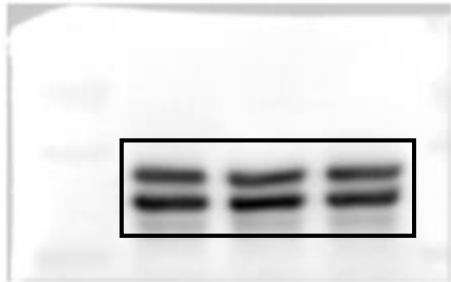

ERK1/2

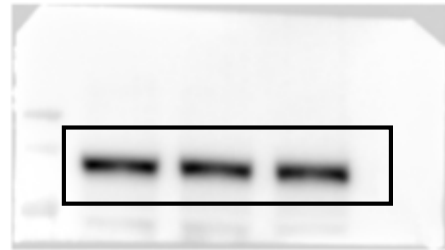

FAK

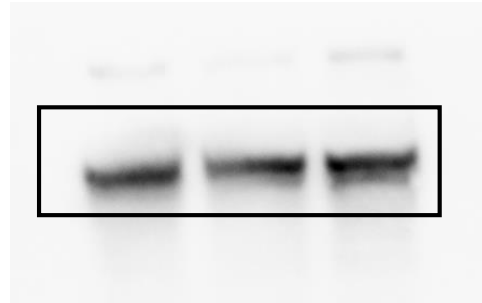

MEK1/2

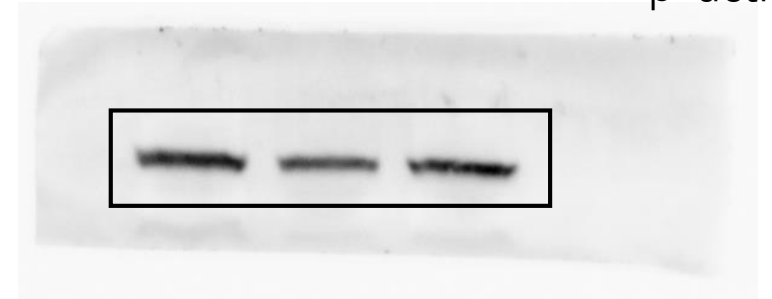

P-FAK

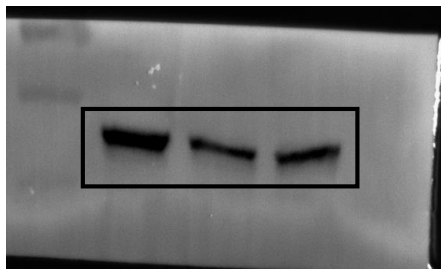

P-MEK1/2

FIG.S4A

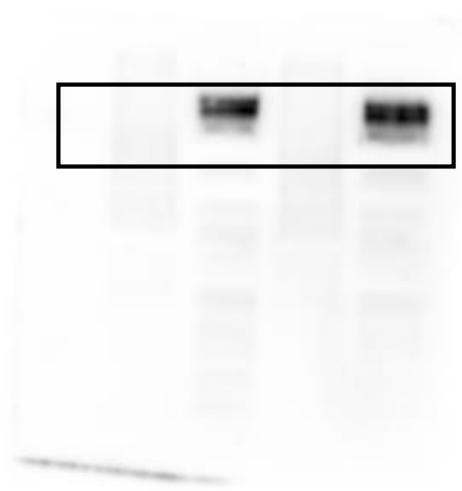

$\beta$ 1-integrin

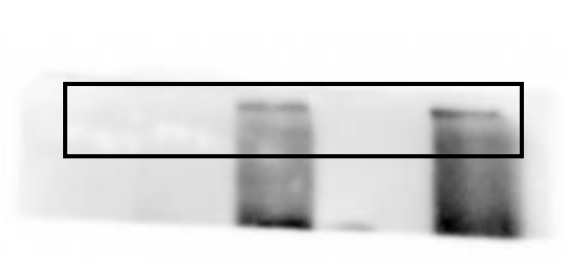

talin1

FIG.S4B

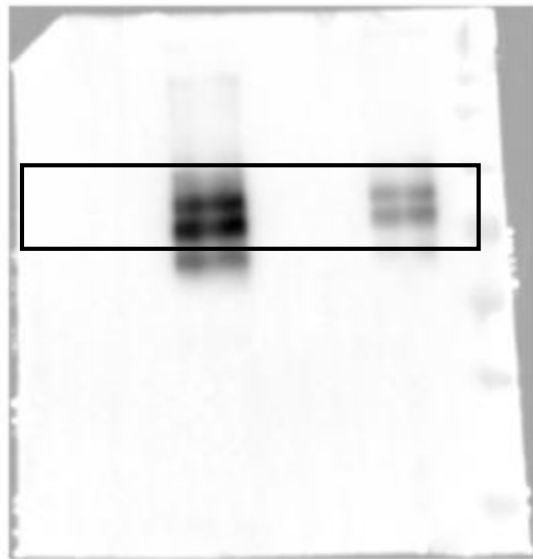

$\beta$ 1-integrin

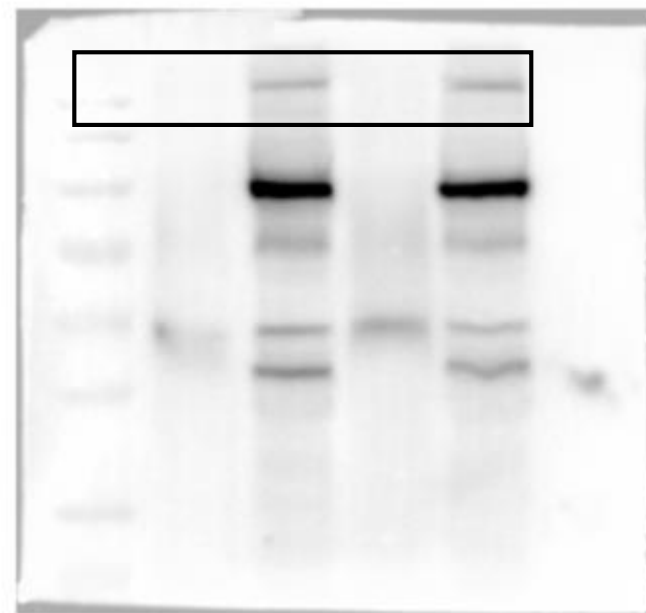

talin1
